# Supplementary material for: Covalent organic–inorganic layered 2D CdCl2(n-hexylamine)2 and not Cd2S2(n-hexylamine)
Source: Royal Society of Chemistry journal article supplement (doi:10.1039/d5ce00011d), 2025-01-01
Supplement: d5ce00011d1.pdf [file d5ce00011d1.pdf]

† Electronic Supplementary Information (ESI)

**Covalent Organic-Inorganic Layered 2D CdCl<sub>2</sub>(n-hexylamine)<sub>2</sub>  
and Not Cd<sub>2</sub>S<sub>2</sub>(n-hexylamine)**

Pavithra Parthiban,<sup>a</sup> Urmila Makhija,<sup>a</sup> Rachit Pratham,<sup>a</sup> Diptikanta Swain,<sup>b</sup> Angshuman Nag<sup>\*a</sup>

<sup>a</sup>Department of Chemistry, Indian Institute of Science Education and Research (IISER), Pune, 411008, India.

<sup>b</sup>Institute of Chemical Technology - IndianOil Odisha Campus, Bhubaneswar 751013, India.

\*Corresponding author email: [angshuman@iiserpune.ac.in](mailto:angshuman@iiserpune.ac.in)

**Table S1:** Attempts to synthesize Cd<sub>2</sub>S<sub>2</sub>(n-hexylamine) lead to formation of Product 1-6. Detailed synthesis of Product-1 is discussed in the manuscript. Product 2-6 are prepared with the same precursor concentrations as in Product-1, but with difference either in reaction apparatus, or in heating time, or in cooling rate, as tabulated below.

| Name      | Apparatus                   | Heating time | Cooling rate            |
|-----------|-----------------------------|--------------|-------------------------|
| Product-1 | Glass vessel in oil bath    | 30 minute    | natural cooling         |
| Product-2 | Glass vessel in oil bath    | 30 minute    | slow cooling ~ 2 °C/ hr |
| Product-3 | Glass vessel in oil bath    | 6 hour       | natural cooling         |
| Product-4 | Glass vessel in oil bath    | 48 hour      | natural cooling         |
| Product-5 | Acid-digestion bomb in oven | 48 hour      | natural cooling         |
| Product-6 | Acid-digestion bomb in oven | 48 hour      | slow cooling ~ 2 °C/ hr |

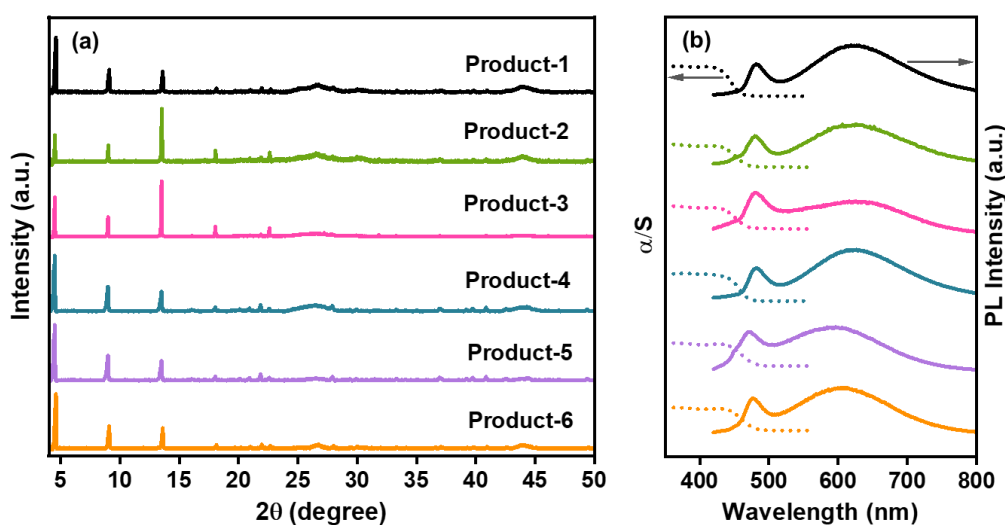

**Fig. S1:** Characterization of synthesized products 1-5 (see Table S1) by (a) Powder XRD and (b) optical absorption and PL spectra ( $\lambda_{\text{ex}} = 405$  nm laser diode).

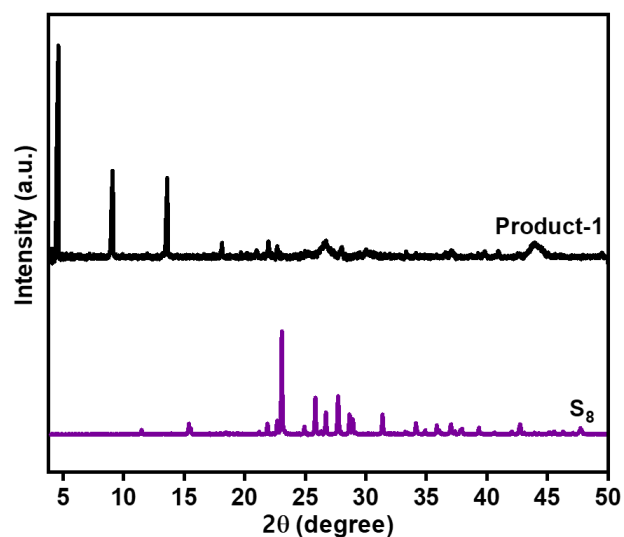

**Fig. S2:** Powder XRD of the Product-1 compared with that of the sulphur precursor.

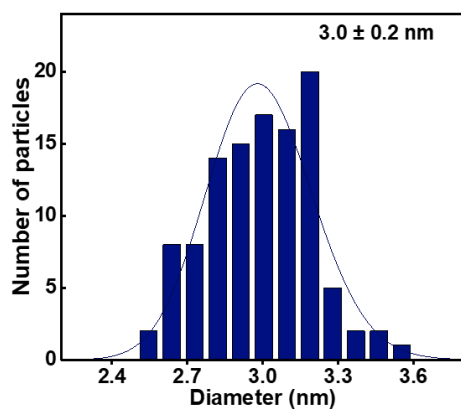

**Fig. S3:** Size distribution plot of CdS NCs separated from Product-1

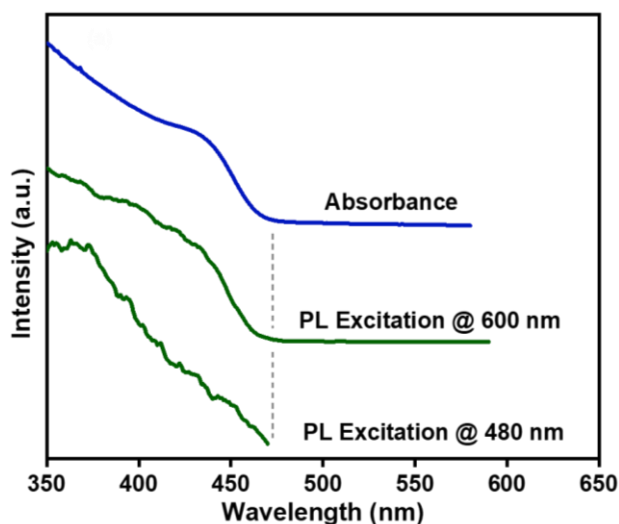

**Fig. S4:** UV-visible absorption spectrum of colloidal CdS NCs is compared with its PL excitation spectra measured at 480 nm (excitonic) and 600 nm (defect-related) emissions.

**Table S2:** Crystallographic data for CdCl<sub>2</sub>(n-hexylamine)<sub>2</sub> obtained from single crystal XRD data collected at 100 K.

|                                            |                                                                                  |
|--------------------------------------------|----------------------------------------------------------------------------------|
| Empirical formula                          | (C <sub>6</sub> H <sub>13</sub> NH <sub>2</sub> ) <sub>2</sub> CdCl <sub>2</sub> |
| Formula weight (g/mol)                     | 385.68                                                                           |
| Temperature (K)                            | 100(2)                                                                           |
| Wavelength (Å)                             | 0.71073                                                                          |
| Crystal System                             | Monoclinic                                                                       |
| Space group                                | <i>P2<sub>1</sub>/c</i>                                                          |
| Unit cell dimensions                       | a = 19.6125(16) Å, b = 5.5243(4) Å, c = 8.0101(7) Å, β = 90.068(3)°              |
| Volume (Å <sup>3</sup> )                   | 867.86(12)                                                                       |
| Z                                          | 2                                                                                |
| Calculated density (g/cm <sup>3</sup> )    | 1.476                                                                            |
| F(000)                                     | 396                                                                              |
| Crystal size                               | 0.157 × 0.136 × 0.104 mm <sup>3</sup>                                            |
| θ <sub>min,max</sub>                       | 2.077, 28.384                                                                    |
| h <sub>min,max</sub>                       | -26, 26                                                                          |
| k <sub>min,max</sub>                       | -7, 5                                                                            |
| l <sub>min,max</sub>                       | -10, 10                                                                          |
| Absorption coefficient (mm <sup>-1</sup> ) | 1.551                                                                            |
| Reflections collected                      | 17561                                                                            |
| Unique reflections/ No. parameters         | 2170/81                                                                          |
| Goodness-of-fit                            | 1.047                                                                            |
| Final R indices (I > 2σ (I))               | R <sub>obs</sub> = 0.0417, wR <sub>obs</sub> = 0.0939                            |
| CCDC Number                                | 2356630                                                                          |

**Table S3:** Bond lengths and angles involved in the hydrogen-bonding network of CdCl<sub>2</sub>(n-hexylamine)<sub>2</sub>.

| Sl. No. | D-H - A    | D – H(Å) | H...A(Å) | D...A(Å) | ∠D - H...A° |
|---------|------------|----------|----------|----------|-------------|
| 1       | N1-H1A-Cl1 | 0.910    | 2.512    | 3.315    | 147.37      |
| 2       | N1-H1B-Cl1 | 0.910    | 2.460    | 3.351    | 166.39      |

**Covalent organic-inorganic PbI<sub>2</sub>(4,4'-bipyridyl).** The synthesis protocol is adapted based on ref 41 of the manuscript, after minor modifications. A solution of PbI<sub>2</sub> was made by adding 230 mg (0.5 mmol) PbI<sub>2</sub> in 1 mL dimethylformamide followed by sonication for 10 minutes. In a different vial, 78 mg (0.5 mmol) 4,4'-bipyridine was dissolved in 1 mL methanol. Then, the methanol solution of 4,4'-bipyridine was slowly injected to the PbI<sub>2</sub> solution along the walls

of the vial. A light yellow colored product precipitated out immediately, which was washed with ethanol three times and then with acetone.

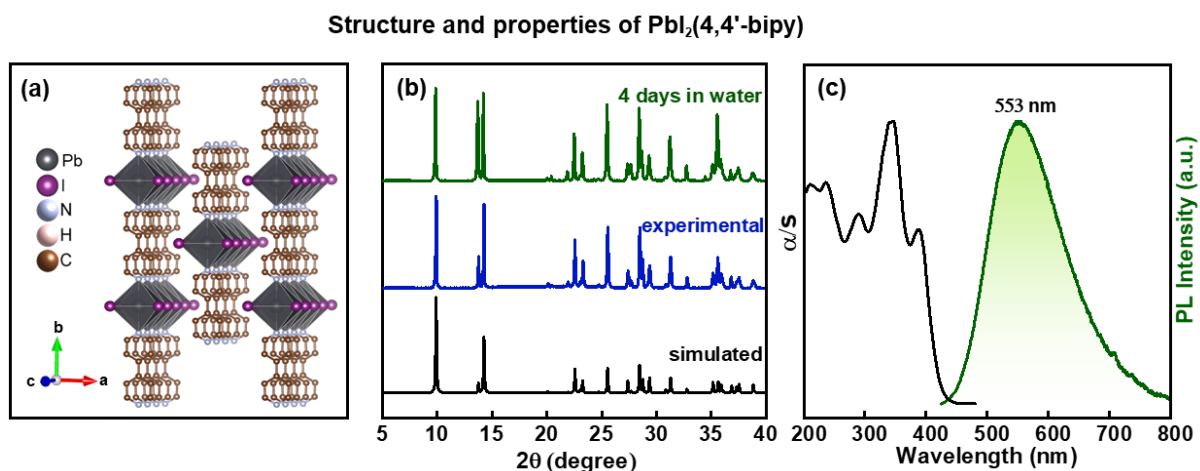

**Fig. S5:** (a) Packing diagram of  $\text{PbI}_2(4,4'\text{-bipyridyl})$  as shown by single crystal XRD data reported in ref 41 of the manuscript. (b) Comparison of experimental powder XRD data of  $\text{PbI}_2(4,4'\text{-bipyridyl})$  with the simulated pattern from reference data (ICSD 154548). Also, the powder XRD pattern of the sample remains unchanged after immersing the sample under water for 4 days. (c) UV-visible absorption and PL spectra of  $\text{PbI}_2(4,4'\text{-bipyridyl})$  in the powder form. The absorption spectrum is obtained from the measured diffused reflectance spectrum by using Kubelka-Munk equation (see Experimental Section), where  $\alpha$  is the absorption coefficient, and  $S$  is the scattering factor.

**Synthesis of  $\text{PbI}_2(\text{ethylenediamine})_2$ .** Lead iodide (0.9 mmol, 414.9 mg,) was dissolved in 1.5 mL of ethylenediamine (solvent as well as reactant) by heating to  $\sim 70^\circ\text{C}$  rendering a transparent solution. The reaction mixture was then left to cool naturally to room temperature, resulting into the formation of a white precipitate. The precipitate was washed with ethanol and acetone, followed by drying in vacuum. The synthesized compound is confirmed to be  $\text{PbI}_2(\text{ethylenediamine})_2$  on comparison of the powder XRD pattern (Fig. S5) with that in prior literature (Ref. 43 of manuscript).

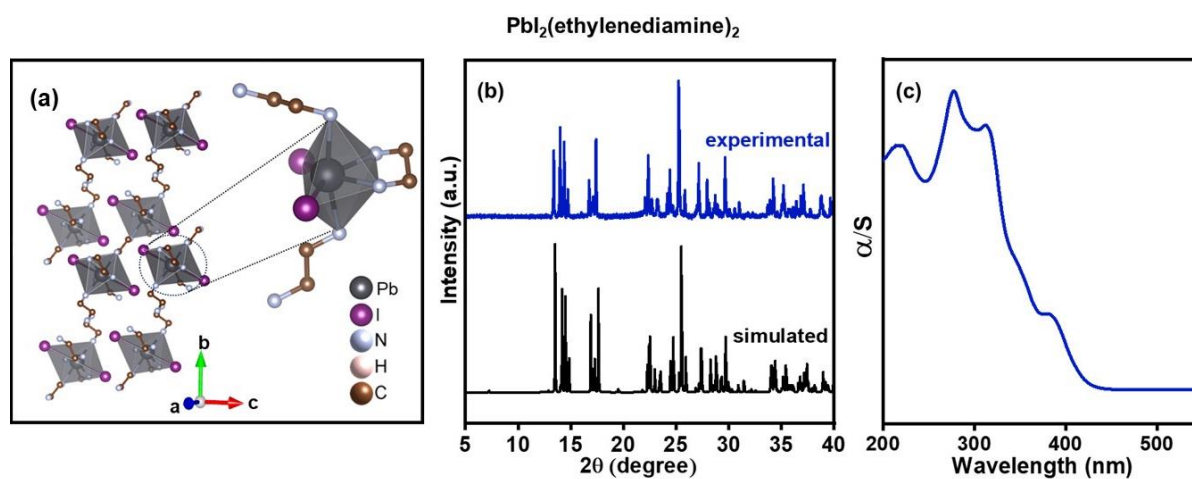

**Fig. S6:** (a) Packing diagram of PbI<sub>2</sub>(ethylenediamine)<sub>2</sub> obtained from the single crystal XRD data reported in ref 43 of the manuscript. Pb is coordinated with two I and four N atoms. (b) Powder XRD patterns of PbI<sub>2</sub>(ethylenediamine)<sub>2</sub> measured at room temperature compared to the simulated reference (ICSD 673646) pattern of the same compound at 123 K. (c) Optical absorption spectrum of PbI<sub>2</sub>(ethylenediamine)<sub>2</sub> at room temperature. Experimentally measured diffused reflectance spectrum was converted to the absorption spectrum by using the Kubelka-Munk equation, where  $\alpha$  is the absorption coefficient, and  $S$  is the scattering factor.
